# Supplementary material for: WG-Storm: a resource-aware scheduler for distributed stream processing engines
Source: PeerJ Comput Sci. 2025 Apr 25;11:e2767. doi: 10.7717/peerj-cs.2767 (PMC12190356; doi:10.7717/peerj-cs.2767)
Supplement: Supplemental Information 2 [file peerj-cs-11-2767-s002.xlsx]

## Sheet: Sheet1
		Worker Process 3	Configuration 01
Time (minutes)	Default Scheduler	Multitenant Scheduler	IsolationScheduler	ResourceAware Scheduler	Wg-Storm Scheduler	A3-Storm Scheduler
0.5	52120	57300	15740	37840	43440	33440
1	62860	57300	25300	56940	75223	65223
1.5	71140	76440	25300	56940	90320	80320
2	81940	76440	34860	76220	98999	88999
2.5	90420	95560	34860	76220	114740	104740
3	101080	95560	44420	95360	148420	138420
3.5	109460	114740	44420	95360	157580	147580
4	120380	114740	53940	114600	166580	156580
4.5	128720	133820	53940	114600	166580	166580
5	139420	133820	63320	144680	187680	177680
5.5	147880	152900	73040	172100	205760	185760
6	167140	152900	82620	191320	225760	205760
6.5	186120	172180	92160	210480	244780	224780
7	205280	191280	101880	229620	263980	243980
7.5	224400	210460	111500	248720	283200	263200
8	243560	229560	121100	268000	293200	283200
8.5	262600	248760	130620	287220	301720	291720
9	281840	267900	140220	306340	320840	310840
9.5	300920	287060	149620	325460	340060	330060
10	320140	306300	159140	344600	359280	349280
10.5	339300	325380	168620	365480	378440	368440
		Worker Process 4	Configuration 02
Time (minutes)	Default Scheduler	Multitenant Scheduler	IsolationScheduler	ResourceAware Scheduler	Wg-Storm Scheduler	A3-Storm Scheduler
0.5	37940	21760	82680	55940	52440	42440
1	37940	32480	89900	55940	53020	43020
1.5	57000	40840	89900	75020	64520	54520
2	57000	51620	97120	75020	72160	62160
2.5	76280	60000	97120	94200	82720	72720
3	76280	70800	104260	94200	97300	87300
3.5	95460	79120	104260	113300	112880	102880
4	95460	89940	111500	113300	134480	124480
4.5	114540	98280	111500	132440	159960	149960
5	114540	109100	118720	132440	169980	169980
5.5	133740	128220	125900	151700	179720	189720					Scheduler
6	152940	147480	125900	170840	199990	199990
6.5	171980	166500	133140	189880	219190	219190
7	191260	185580	133140	209140	239640	229640
7.5	210420	204720	140300	228260	249440	239440
8	229600	224000	140300	236740	257560	247560
8.5	248800	243180	147500	247520	269799	269799
9	267980	262240	147500	247520	288900	288900
9.5	287240	270660	154660	266760	318940	308940
10	306340	281560	154660	266760	337520	327520
10.5	325440	289920	161840	285760	356420	346420
		Worker Process 5	Configuration 03
Time (minutes)	Default Scheduler	Multitenant Scheduler	IsolationScheduler	ResourceAware Scheduler	Wg-Storm Scheduler	A3-Storm Scheduler
0.5	56520	45440	16760	191140	153451	133451
1	75700	49020	18260	210180	160795	140795
1.5	94880	64520	23540	229180	189134	159134
2	94880	68160	24900	229180	209180	169180
2.5	114040	83720	30360	248420	248829	188829
3	114040	87300	31860	248420	258199	198199
3.5	133220	102880	37240	267580	277729	207729
4	133220	106480	38640	267580	297450	227450
4.5	152360	121960	44000	286680	306789	236789
5	171360	125580	45340	286680	326367	256367
5.5	190560	144720	50700	305760	335760	275760
6	190560	163940	52120	305760	345781	295781
6.5	190560	183120	58920	314780	364156	304156
7	209700	202240	65760	333980	373415	323415
7.5	209700	221440	72520	343200	369820	349820
8	228880	240560	79420	362440	399745	359745
8.5	228880	259780	86180	381720	411720	371720
9	248100	278900	92920	400840	420123	390123
9.5	248100	298040	98260	430060	459465	419465
10	267200	317220	99680	449280	459482	439482
10.5	267200	336420	105040	468440	498440	458440
		Worker Process 5	Configuration 04
Time (minutes)	Default Scheduler	Multitenant Scheduler	IsolationScheduler	ResourceAware Scheduler	Wg-Storm Scheduler	A3-Storm Scheduler
0.5	248440	323680	18760	29920	163451	323680
1	267640	332800	20260	35880	170795	362800
1.5	267640	342800	26540	35880	209134	362800
2	286800	351920	27900	41860	229180	381920
2.5	286800	361920	32360	47860	258829	381920
3	306020	371080	32860	47860	268199	401080
3.5	306020	381080	35240	53840	287729	401080
4	325100	390240	40640	53840	307450	420240
4.5	325100	400240	45000	59840	326789	420240
5	344220	419340	48340	59840	346367	439340
5.5	344220	429340	52700	65800	365760	439340
6	363360	438440	54120	65800	375781	458440
6.5	363360	448440	59920	73800	394156	458440
7	382560	457620	67760	73800	403415	477620
7.5	382560	467620	75520	79780	419820	477620
8	401700	476840	82420	85760	439745	496840
8.5	401700	486840	90180	91760	451720	496840
9	420800	495880	95920	97760	470123	515880
9.5	420800	505880	100260	99760	499965	515880
10	439960	515080	102680	111740	499482	535080
10.5	439960	525080	109040	121740	528440	535080
	459220	554100	109040	137720
	459220	554100	119040	107720
	478360	573320	119440	113700
	478360	573320	119740	119680
	497460	592400	119800	119680
	497460	592400	119950	119680
	516600	611540	119980	119680
	516600	611540	119980	119680
	535680	630620	119980	119680
		Worker Process 4	Configuration 05
Time (minutes)	Default Scheduler	Multitenant Scheduler	IsolationScheduler	ResourceAware Scheduler	Wg-Storm Scheduler	A3-Storm Scheduler
0.5	91420	69180	16760	29920	153451	143451
1	103420	82180	18260	35880	156795	146795
1.5	114840	97600	23540	35880	179134	159134
2	126840	102600	24900	41860	199180	169180
2.5	133240	119980	30360	47860	208829	178829
3	145240	129980	31860	47860	228199	188199
3.5	157620	132380	37240	53840	237729	197729
4	170620	142380	38640	53840	247450	207450
4.5	194200	154760	44000	59840	256789	216789
5	214200	174760	45340	59840	266367	226367
5.5	230580	197180	50700	65800	295760	235760
6	250580	207180	52120	65800	305781	245781
6.5	277080	219640	58920	73800	314156	254156
7	297080	219640	65760	73800	333415	263415
7.5	303460	231920	72520	79780	349820	279820
8	313460	231920	79420	85760	359745	289745
8.5	329960	244280	86180	91760	371720	291720
9	349960	254280	92920	97760	380123	300123
9.5	356400	256780	98260	99760	399465	329465
10	376400	256780	99680	111740	429482	349482
10.5	402840	269220	105040	121740	438440	368440
	82840	169220		137720
	89300	181560		107720
	89300	181560		113700
	95740	193980		119680
	95740	193980		119680
	102160	206440		119680
	102160	206440		119680
	108640	211300		119680
	108640	211300		119680
			configuration 06
Time (minutes)	Default Scheduler	Multitenant Scheduler	IsolationScheduler	ResourceAware Scheduler	Wg-Storm Scheduler	A3-Storm Scheduler
0.5	120540	26560	24760	58940	123451	103451
1	130540	29280	26260	55940	136795	116795
1.5	140540	34000	28540	75020	149134	129134
2	150540	36800	24900	75020	169180	149180
2.5	160540	41480	28360	94200	188829	168829
3	180540	44380	31860	94200	198199	188199
3.5	200540	49120	37240	113300	207729	207729
4	210540	51980	38640	113300	217450	227450
4.5	230540	56740	44000	132440	236789	246789
5	240540	59460	45340	132440	246367	266367
5.5	260540	64100	50700	151700	265760	285760
6	300540	66980	52120	170840	275781	305781
6.5	310540	71460	58920	189880	294156	314156
7	320540	74460	65760	209140	303415	323415
7.5	340540	79080	72520	228260	319820	349820
8	360540	82000	79420	236740	329745	369745
8.5	380540	86680	86180	247520	331720	371720
9	400540	89480	92920	247520	340123	380123
9.5	420540	94160	98260	266760	359465	399465
10	440540	97000	99680	266760	379482	409482
10.5	440540	101680	105040	285760	398440	418440
11	420540	94160	98260	266760	359465	429465
11.5	440540	97000	99680	266760	379482	439482
12	440540	101680	105040	285760	398440	448440
12.5	46540	116800		119680
	46540	119640		119680
	46540	124320		119680
	46540	127220		119680
	46540	131920		119680
	120540	134680		119680
	120540
			Configuration 07
Time (minutes)	Default Scheduler	Multitenant Scheduler	IsolationScheduler	ResourceAware Scheduler	Wg-Storm Scheduler	A3-Storm Scheduler
0.5	120540	46560	34760	68940	223451	203451
1	230540	49280	36260	65940	236795	216795
1.5	240540	54000	38540	85020	249134	229134
2	250540	56800	34900	85020	269180	249180
2.5	260540	61480	38360	104200	288829	278829
3	280540	74380	41860	104200	298199	288199
3.5	300540	89120	47240	123300	307729	307729
4	310540	91980	48640	133300	317450	327450
4.5	330540	106740	54000	142440	336789	346789
5	340540	119460	55340	142440	356367	366367
5.5	360540	124100	60700	161700	375760	385760
6	400540	136980	62120	180840	395781	405781
6.5	410540	141460	68920	199880	414156	414156
7	420540	154460	75760	219140	433415	423415
7.5	440540	169080	82520	238260	459820	449820
8	460540	172000	89420	246740	479745	469745
8.5	480540	186680	96180	257520	491720	471720
9	500540	199480	102920	267520	500123	480123
9.5	520540	204160	108260	276760	529465	499465
10	540540	217000	109680	286760	549482	509482
10.5	540540	227000	109680	286760	569482	509482
			configuration 08
Time (minutes)	Default Scheduler	Multitenant Scheduler	IsolationScheduler	ResourceAware Scheduler	Wg-Storm Scheduler	A3-Storm Scheduler
0.5	111420	69180	16760	69920	283451	213451
1	123420	82180	18260	65880	356795	276795
1.5	144840	97600	23540	65880	379134	289134
2	166840	102600	24900	71860	399180	299180
2.5	183240	119980	30360	77860	408829	308829
3	205240	129980	31860	77860	428199	318199
3.5	227620	132380	37240	83840	437729	327729
4	240620	142380	38640	83840	447450	347450
4.5	264200	154760	44000	89840	456789	366789
5	274200	174760	45340	89840	466367	386367
5.5	290580	197180	50700	105800	495760	405760
6	310580	207180	52120	105800	505781	425781
6.5	337080	219640	58920	113800	514156	444156
7	357080	219640	65760	113800	533415	463415
7.5	373460	231920	72520	119780	549820	489820
8	393460	231920	79420	125760	559745	509745
8.5	419960	244280	86180	131760	571720	521720
9	439960	254280	92920	147760	580123	530123
9.5	446400	256780	98260	159760	599465	549465
10	466400	256780	99680	161740	629482	569482
10.5	482840	269220	105040	171740	638440	588440
			configuration 09
Time (minutes)	Default Scheduler	Multitenant Scheduler	IsolationScheduler	ResourceAware Scheduler	Wg-Storm Scheduler	A3-Storm Scheduler
0.5	211420	69180	36760	109920	303451	283451
1	223420	82180	38260	115880	366795	316795
1.5	244840	97600	53540	125880	389134	339134
2	266840	102600	54900	131860	409180	359180
2.5	283240	119980	50360	147860	418829	388829
3	305240	129980	51860	157860	438199	398199
3.5	327620	132380	67240	163840	447729	407729
4	340620	142380	78640	173840	457450	427450
4.5	364200	154760	84000	189840	466789	446789
5	374200	174760	105340	199840	476367	466367
5.5	390580	197180	110700	205800	485760	485760
6	410580	207180	122120	215800	515781	505781
6.5	437080	219640	138920	223800	524156	514156
7	457080	219640	145760	233800	533415	533415
7.5	473460	231920	152520	249780	549820	549820
8	493460	231920	169420	255760	559745	559745
8.5	519960	244280	176180	261760	561720	551720
9	539960	254280	192920	277760	580123	550123
9.5	546400	256780	218260	289760	609465	569465
10	566400	256780	229680	291740	629482	579482
10.5	582840	269220	235040	301740	648440	598440
			Exclamation Topology
Time (minutes)	Default Scheduler	Multitenant Scheduler	IsolationScheduler	ResourceAware Scheduler	Wg-Storm Scheduler	A3-Storm Scheduler
0.5	5600	23860	2600	14920	15920	19920
1	5600	23860	2600	16880	18880	25880
1.5	7780	29820	3780	20180	20880	25880
2	7780	29820	3780	23860	25860	31860
2.5	8980	35800	4980	25860	28860	37860
3	8980	35800	4980	28860	30860	37860
3.5	10180	41720	6180	30840	33840	43840
4	10180	41720	6180	32840	38840	43840
4.5	11380	47740	7380	34840	43840	49840
5	11380	47740	7380	36840	46840	49840
5.5	12560	53700	8560	38800	49800	55800
6	14760	53700	9760	40800	53800	55800
6.5	16960	59700	10960	42800	58800	61800
7	18960	59700	11960	44800	62800	61800
7.5	19160	65640	12160	47780	65780	67780
8	21160	65640	13160	49760	66760	73760
8.5	22360	71620	14360	52760	70760	79760
9	24360	71620	15360	55760	80760	85760
9.5	26560	77580	16560	57760	83760	85760
10	28560	77580	17560	59740	87740	91740
10.5	30760	83540	18760	63740	93740	91740
	1			1
Time (minutes)	Default Scheduler	Multitenant Scheduler	IsolationScheduler	ResourceAware Scheduler	Wg-Storm Scheduler	A3-Storm Scheduler
0.5	12060	14620	5900	13920	15920	10920
1	14440	19360	6300	14880	18880	25880
1.5	15440	19360	7780	14880	20880	25880
2	17920	24180	8780	15860	25860	31860
2.5	19920	24180	9980	16860	28860	32860
3	20320	28940	10980	17860	30860	32860
3.5	22320	28940	11180	17860	33840	33840
4	24700	33700	12180	19840	38840	34840
4.5	26700	33700	13380	21840	43840	36840
5	28100	38480	14380	23840	46840	38840
5.5	30100	38480	15560	25800	47800	40800
6	31500	43240	16760	27800	48800	42800
6.5	32500	43240	17960	29800	49800	45800
7	33880	48020	18160	32800	51800	46800
7.5	35880	48020	19160	34780	53780	47780
8	37280	52800	20360	37760	55760	49760
8.5	39548	52800	21360	39760	57160	51760
9	41894	57580	22560	41760	59760	53760
9.5	43874	57580	23560	43760	59760	55760
10	45876	62360	24760	45140	61740	57740
10.5	47648	62360	26760	46740	64740	60740
Time (minutes)	Default Scheduler	Multitenant Scheduler	IsolationScheduler	ResourceAware Scheduler	Wg-Storm Scheduler	A3-Storm Scheduler
0.5	13060	12620	6900	13920	15920	16920
1	14440	14360	7300	14880	18880	18880
1.5	15440	16360	8780	14880	20880	20880
2	17920	18180	9780	15860	25860	22860
2.5	19920	20180	10980	16860	28860	24860
3	20320	22940	11180	17860	30860	26860
3.5	22320	23940	12180	17860	33840	28840
4	24700	26700	13380	19840	36840	30840
4.5	26700	28700	14380	21840	38840	36840
5	28100	31480	15560	23840	40840	38840
5.5	30100	33480	16760	25800	42800	40800
6	31500	35240	17960	27800	44800	42800
6.5	32500	37240	18160	29800	46800	45800
7	34880	39020	19160	32800	48800	46800
7.5	36880	42020	20360	34780	49780	47780
8	40280	44800	21360	37760	52760	49760
8.5	42548	46800	22560	39760	54160	51760
9	44894	48580	23560	41760	56760	53760
9.5	45874	50580	24760	43760	58760	55760
10	47876	52360	26760	45140	60740	57740
10.5	49648	52460	28760	46740	60740	60740
Time (minutes)	Default Scheduler	Multitenant Scheduler	IsolationScheduler	ResourceAware Scheduler	Wg-Storm Scheduler	A3-Storm Scheduler
0.5	13060	12620	10980	13920	15920	16920
1	14440	14360	11180	14880	18880	18880
1.5	15440	16360	12180	14880	20880	20880
2	17920	18180	13380	15860	25860	22860
2.5	19920	20180	14380	16860	28860	24860
3	20320	22940	15560	17860	30860	26860
3.5	22320	23940	16760	17860	33840	28840
4	24700	26700	17960	19840	36840	30840
4.5	26700	28700	18160	21840	38840	36840
5	28100	31480	19160	23840	40840	38840
5.5	30100	33480	20360	25800	42800	40800
6	31500	35240	21360	27800	44800	42800
6.5	32500	37240	22560	29800	46800	45800
7	34880	39020	23560	32800	48800	46800
7.5	36880	42020	24760	34780	49780	47780
8	40280	44800	26760	37760	52760	49760
8.5	42548	46800	28760	39760	54160	51760
9	44894	48580	30560	41760	56760	53760
9.5	45874	50580	32760	43760	58760	55760
10	47876	52360	34760	45140	60740	57740
10.5	49648	52460	36760	46740	60740	60740
Time (minutes)	Default Scheduler	Multitenant Scheduler	IsolationScheduler	ResourceAware Scheduler	Wg-Storm Scheduler	A3-Storm Scheduler
0.5	20320	20180	16760	21840	36840	28840
1	22320	22940	17960	23840	38840	30840
1.5	24700	23940	18160	25800	40840	36840
2	26700	26700	19160	27800	42800	38840
2.5	28100	28700	20360	29800	44800	40800
3	30100	31480	21360	32800	46800	42800
3.5	31500	33480	22560	34780	48800	45800
4	32500	35240	23560	37760	49780	46800
4.5	34880	37240	24760	39760	52760	47780
5	36880	39020	26760	41760	54160	49760
5.5	40280	42020	28760	43760	56760	51760
6	42548	44800	30560	45140	58760	53760
6.5	44894	46800	32760	46740	60740	55760
7	45874	48580	34760	47800	60740	57740
7.5	47876	50580	36760	48780	62780	60740
8	49648	52360	37760	49760	62760	61760
8.5	50548	52460	38760	51760	64160	61760
9	51894	54580	40560	53760	66760	63760
9.5	52874	56580	42760	54760	68760	65760
10	53876	58360	44760	55140	70740	67740
10.5	54648	60460	46760	56740	70740	69740
Time (minutes)	Default Scheduler	Multitenant Scheduler	IsolationScheduler	ResourceAware Scheduler	Wg-Storm Scheduler	A3-Storm Scheduler
0.5	32500	35240	20360	41760	44800	42800
1	34880	37240	21360	43760	46800	45800
1.5	36880	39020	22560	45140	48800	46800
2	40280	42020	23560	46740	49780	47780
2.5	42548	44800	24760	47800	52760	49760
3	44894	46800	26760	48780	54160	51760
3.5	45874	48580	28760	49760	56760	53760
4	47876	50580	30560	51760	58760	55760
4.5	49648	52360	32760	53760	60740	57740
5	50548	52460	34760	54760	60740	60740
5.5	51894	54580	36760	55140	62780	61760
6	52874	56580	37760	56740	62760	61760
6.5	53876	58360	38760	57740	64160	63760
7	54648	58580	40560	57800	66760	65760
7.5	56876	60580	42760	58780	68760	67740
8	57648	61360	44760	59760	70740	69740
8.5	58548	62460	46760	61760	70740	70760
9	59894	63580	47560	63760	72760	71760
9.5	60874	64580	48760	64760	73760	72760
10	61876	65360	49760	65140	74740	73740
10.5	62648	66460	50760	66740	75740	74740
Time (minutes)	Default Scheduler	Multitenant Scheduler	IsolationScheduler	ResourceAware Scheduler	Wg-Storm Scheduler	A3-Storm Scheduler
0.5	18320	20180	20360	31760	33800	42800
1	22320	22940	21360	43760	46800	45800
1.5	24700	23940	22560	45140	48800	46800
2	26700	26700	23560	46740	49780	47780
2.5	28100	28700	24760	47800	52760	49760
3	30100	31480	26760	48780	54160	51760
3.5	31500	33480	28760	49760	56760	53760
4	32500	35240	30560	51760	58760	55760
4.5	34880	37240	32760	53760	60740	57740
5	36880	39020	34760	54760	60740	60740
5.5	40280	42020	36760	55140	62780	61760
6	42548	44800	37760	56740	62760	61760
6.5	44894	46800	38760	57740	64160	63760
7	45874	48580	40560	57800	66760	65760
7.5	47876	50580	42760	58780	68760	66740
8	49648	52360	44760	59760	70740	67740
8.5	50548	52460	46760	61760	70740	68760
9	51894	54580	47560	63760	72760	69760
9.5	52874	56580	48760	64760	73760	70760
10	53876	58360	49760	65140	74740	71740
10.5	54648	60460	50760	66740	75740	72740
Time (minutes)	Default Scheduler	Multitenant Scheduler	IsolationScheduler	ResourceAware Scheduler	Wg-Storm Scheduler	A3-Storm Scheduler
0.5	21320	20180	18360	40760	40800	37800
1	23320	22940	18360	43760	46800	38800
1.5	25700	23940	19560	45140	48800	39800
2	27700	26700	21560	46740	49780	50780
2.5	29100	28700	23760	47800	52760	49760
3	30100	31480	26760	48780	54160	51760
3.5	32500	33480	28760	49760	56760	52760
4	33500	35240	30560	51760	58760	53760
4.5	34880	37240	32760	53760	60740	54740
5	36880	39020	34760	54760	60740	56740
5.5	40280	42020	36760	55140	62780	60760
6	42548	44800	37760	56740	62760	60760
6.5	44894	46800	38760	57740	64160	61760
7	45874	48580	40560	57800	66760	63760
7.5	52876	50580	42760	58780	68760	65740
8	53648	52360	44760	59760	70740	66740
8.5	54548	52460	46760	61760	70740	67760
9	55894	54580	47560	63760	72760	68760
9.5	56874	56580	48760	64760	73760	69760
10	57876	58360	49760	65140	74740	70740
10.5	58648	60460	50760	66740	75740	71740
Time (minutes)	Default Scheduler	Multitenant Scheduler	IsolationScheduler	ResourceAware Scheduler	Wg-Storm Scheduler	A3-Storm Scheduler
0.5	21520	17180	16360	38760	40800	37800
1	23320	22940	18360	40760	46800	38800
1.5	25700	23940	19560	42140	48800	39800
2	27700	26700	21560	44740	49780	47780
2.5	29100	28700	23760	46800	52760	48760
3	30100	31480	26760	47780	54160	50760
3.5	32500	33480	28760	49760	56760	51760
4	33500	35240	30560	50760	58760	52760
4.5	34880	37240	32760	51760	60740	54740
5	36880	39020	34760	52760	60740	56740
5.5	38280	42020	36760	54140	62780	58760
6	40548	44800	37760	55740	62760	59760
6.5	42894	46800	38760	56740	64160	61760
7	44874	48580	40560	57800	66760	63760
7.5	46876	50580	42760	57780	68760	65740
8	48648	52360	44760	58760	70740	66740
8.5	50548	52460	46760	60760	72740	69740
9	52894	54580	47560	62760	74760	68760
9.5	53874	56580	48760	64860	75760	70760
10	54876	58360	49760	65140	76740	72740
10.5	54948	60460	50760	66751	77740	73740
